# Supplementary material for: Characterization of old RHDV strains by complete genome sequencing identifies a novel genetic group
Source: PubMed Central journal article supplement (PMC5648873; doi:10.1038/s41598-017-13902-2), 2017-10-19
Supplement: 41598_2017_13902_MOESM1_ESM.pdf [file 41598_2017_13902_MOESM1_ESM.pdf]

Characterization of old RHDV strains by complete genome sequencing identifies a novel genetic group

Ana M. Lopes, Diogo Silvério, Maria J. Magalhães, Helena Areal, Paulo C. Alves, Pedro J. Esteves, Joana Abrantes

**Supplementary Table S1.** GenBank accession numbers of the sequences used for the analyses.

| <b>Group</b>                                    | <b>GenBank accession number_strain identification</b> |
|-------------------------------------------------|-------------------------------------------------------|
| G1                                              | KP090974_CB110_Portugal_1994                          |
|                                                 | KP090975_CB154_Portugal_1997                          |
|                                                 | JF438967_CB156_Portugal_1997                          |
|                                                 | EF558578_Eisenhuttenstadt_1989                        |
|                                                 | JX886001_CB194_Portugal_2006                          |
|                                                 | JX886002_CB137_Portugal_Alpiarça_1995                 |
|                                                 | Z29514_SD_France_1989                                 |
|                                                 | Z49271_RHDV-AST89_1989                                |
|                                                 | KP129400_Bar01-11_Spain_2011                          |
|                                                 | G2                                                    |
| EU003579_Italy90_1990                           |                                                       |
| EU003580_Korea90_1990                           |                                                       |
| KP144789_Pd_Poland/1989                         |                                                       |
| KP144790_KGM_Poland/1988                        |                                                       |
| KT006721_NZL/Canterbury/Lincoln/517/2013        |                                                       |
| KT006722_NZL/Canterbury/MackenzieBasin/95/2012  |                                                       |
| KT006723_NZL/HawkesBay/BoundaryStream/94/2012   |                                                       |
| KT006724_NZL/Canterbury/Hawarden/320/2013       |                                                       |
| KT006725_NZL/Otago/Queensberry/74/2013          |                                                       |
| KT006726_NZL/Otago/Taras/61/2014                |                                                       |
| KT006727_NZL/Otago/Luggate/67/2014              |                                                       |
| KT006728_NZL/Otago/Alexandra/64/2014            |                                                       |
| KT006729_NZL/Otago/Wanaka/63/2014               |                                                       |
| KT006730_NZL/Canterbury/MackenzieBasin/322/2013 |                                                       |
| KT006731_AUS/NSW/Hall/WAT1-13/2007              |                                                       |
| KT006732_AUS/NSW/Murrumbateman/BlueGums/2014    |                                                       |
| KT006733_AUS/WA/Gnowangerup/1999                |                                                       |
| KT006734_AUS/SA/FlindersRanges/1999             |                                                       |
| KT006735_AUS/WA/Bunbury/2000                    |                                                       |
| KT006736_AUS/SA/Robe/2000                       |                                                       |
| KT006737_AUS/SA/FlindersRanges/2002             |                                                       |
| KT006738_AUS/SA/OneTreeHill/2003                |                                                       |

|        |                                      |
|--------|--------------------------------------|
|        | KT006739_AUS/SA/Coorong/2004         |
|        | KT006740_AUS/SA/BillaKallina/2004    |
|        | KT006741_AUS/SA/Woodcroft/2005       |
|        | KT006742_AUS/SA/FlindersRanges/2006  |
|        | KT006743_AUS/TAS/SouthArm/2007       |
|        | KT006744_AUS/SA/Hillbank/2008        |
|        | KT006745_AUS/SA/Bulgania/2009        |
|        | KT006746_AUS/WA/WonganHills/2012     |
|        | KT006747_AUS/NSW/Grafton/2013        |
|        | KT280058_BlueGums-2                  |
|        | KT280059_BLMT-2                      |
|        | KT344770_AUS/CSIRO/Master            |
|        | KT344771_AUS/CSIRO/Working           |
|        | KT344772_AUS/CSIRO/Release           |
|        | KT344773_AUS/EMAI/Batch-1A           |
|        | KT344774_AUS/EMAI/Batch-1D           |
| G3-G5  | DQ189077_Bahrain_2001                |
|        | EF363035_clonepJG-RHDV-DD06_1999     |
|        | EF558575_Ascot_UK_1992               |
|        | EF558576_Jena_Germany                |
|        | EF558577_Meiningen_Germany_1993      |
|        | KP144792_BLA_Poland/1994             |
|        | X87607_BS89_1989                     |
| G6     | AB300693_Hokkaido/2002/JPN_2002      |
|        | AF258618_Iowa2000_2000               |
|        | AY523410_CD/China                    |
|        | DQ205345_JX/CHA/97_1997              |
|        | DQ280493_ChinaWHNRH                  |
|        | EF558581_Erfurt_2000                 |
|        | EF558582_Dachswald_2000              |
|        | EF558583_Triptis_1996                |
|        | EF558584_Rossi_2002                  |
|        | EU003578_IN-05_2005                  |
|        | EU003581_NY-1_2001                   |
|        | EU003582_UT-01_2001                  |
|        | HM623309_NJ-2009_China_2009          |
|        | JF412629_HYD_China_Heilongjiang_2005 |
|        | KF677011_STR2012_Poland/2012         |
| MRCV   | GQ166866_MRCV_USA_2001               |
| RCV-A1 | EU871528_RCV-A1_Australia_2007       |
| RHDV2  | KM878681_RHDV-N11_Spain              |
|        | KM979445_CBVal16_Portugal_2012       |
|        | KP129395_Rij06-12_Spain              |
|        | KP129396_Seg08-12_Spain              |
|        | KP129397_Tar06-12_Spain              |

|  |                              |
|--|------------------------------|
|  | KP129399_Zar06-12_Spain      |
|  | KP129398_Zar11-11_Spain_2010 |
